# Supplementary material
Source: PubMed Central journal article supplement (PMC337026)
Supplement: pnas_0308143100_1.pdf [file pnas_0308143100_1.pdf]

**Table 2. Helical parameters for A4T4 and T4A4**

|            | Prop-Tw       | Buckle        | Rise        | Tilt         | Roll          | Twist        |
|------------|---------------|---------------|-------------|--------------|---------------|--------------|
| <b>G-C</b> | 10.19+/-6.80  | 21.13+/-2.19  | 0.00+/-0.00 | 0.00+/-0.00  | 0.00+/-0.00   | 0.00+/-0.00  |
| <b>C-G</b> | -14.05+/-1.27 | 12.74+/-1.96  | 3.58+/-0.05 | 6.39+/-2.35  | 3.95+/-3.55   | 43.23+/-1.29 |
| <b>A-T</b> | -15.11+/-1.83 | 9.17+/-1.37   | 3.37+/-0.09 | -1.29+/-0.69 | 11.91+/-0.89  | 28.26+/-1.15 |
| <b>A-T</b> | -17.28+/-3.34 | 1.27+/-2.63   | 3.45+/-0.06 | 0.09+/-0.69  | 5.81+/-2.13   | 34.30+/-0.80 |
| <b>A-T</b> | -9.57+/-3.75  | 1.45+/-4.17   | 3.27+/-0.05 | -1.26+/-2.02 | 1.68+/-1.80   | 36.81+/-0.55 |
| <b>A-T</b> | -8.19+/-1.72  | 4.36+/-0.92   | 3.16+/-0.06 | -4.18+/-0.68 | -0.60+/-1.92  | 37.24+/-0.80 |
| <b>T-A</b> | -7.87+/-1.95  | -4.56+/-1.09  | 3.85+/-0.09 | -0.02+/-0.23 | -12.26+/-0.43 | 32.68+/-0.47 |
| <b>T-A</b> | -10.35+/-3.16 | -2.75+/-3.87  | 3.18+/-0.05 | 4.68+/-0.59  | 0.56+/-2.10   | 37.53+/-0.92 |
| <b>T-A</b> | -16.78+/-1.42 | -1.82+/-2.48  | 3.28+/-0.04 | 0.25+/-1.68  | 1.06+/-1.83   | 36.25+/-1.21 |
| <b>T-A</b> | -15.19+/-1.71 | -8.22+/-2.43  | 3.40+/-0.08 | 0.35+/-0.55  | 5.76+/-1.09   | 34.03+/-0.78 |
| <b>G-C</b> | -14.13+/-1.35 | -12.50+/-2.43 | 3.39+/-0.03 | 0.82+/-0.53  | 12.61+/-0.72  | 28.19+/-1.12 |
| <b>C-G</b> | 9.90+/-7.07   | -22.41+/-3.29 | 3.61+/-0.05 | -6.25+/-1.87 | 4.95+/-3.88   | 43.49+/-1.34 |

|            | Prop-Tw       | Buckle       | Rise        | Tilt         | Roll         | Twist        |
|------------|---------------|--------------|-------------|--------------|--------------|--------------|
| <b>C-G</b> | -11.18+/-1.72 | -1.64+/-2.78 | 0.00+/-0.00 | 0.00+/-0.00  | 0.00+/-0.00  | 0.00+/-0.00  |
| <b>G-C</b> | -3.05+/-3.38  | 5.40+/-3.64  | 3.01+/-0.06 | -0.97+/-1.94 | 7.47+/-1.17  | 31.39+/-1.03 |
| <b>T-A</b> | -13.69+/-1.60 | 5.21+/-4.02  | 3.38+/-0.12 | 4.48+/-0.43  | -0.75+/-1.70 | 33.72+/-0.60 |
| <b>T-A</b> | -19.69+/-2.40 | 15.36+/-3.25 | 3.65+/-0.08 | -0.46+/-1.23 | 2.68+/-0.51  | 37.22+/-0.49 |
| <b>T-A</b> | -2.70+/-3.40  | -8.15+/-1.74 | 3.16+/-0.13 | 4.16+/-0.66  | -5.06+/-2.48 | 37.22+/-0.80 |
| <b>T-A</b> | 1.19+/-1.91   | -6.92+/-1.22 | 3.19+/-0.05 | 4.07+/-1.10  | -4.87+/-0.46 | 28.10+/-1.63 |
| <b>A-T</b> | -0.71+/-2.35  | 3.95+/-3.42  | 3.63+/-0.21 | -0.05+/-0.66 | 11.54+/-0.98 | 37.70+/-0.78 |
| <b>A-T</b> | -4.23+/-2.40  | 6.50+/-2.36  | 3.12+/-0.04 | -3.17+/-0.80 | -3.92+/-0.67 | 26.83+/-0.38 |
| <b>A-T</b> | -19.41+/-1.80 | 14.00+/-3.11 | 3.12+/-0.07 | -3.56+/-0.96 | -3.33+/-1.42 | 38.01+/-0.76 |
| <b>A-T</b> | -13.80+/-1.77 | -6.27+/-2.13 | 3.64+/-0.10 | 0.42+/-0.71  | 2.35+/-0.71  | 36.64+/-0.67 |
| <b>C-G</b> | -4.29+/-2.45  | -5.16+/-2.01 | 3.35+/-0.04 | -4.60+/-1.12 | 0.64+/-1.87  | 33.90+/-0.96 |
| <b>G-C</b> | -10.43+/-2.00 | 1.44+/-1.42  | 3.01+/-0.07 | 0.46+/-1.17  | 6.88+/-1.04  | 31.63+/-0.55 |
